# Supplementary material for: High-Protein Foods for Dysphagia: Manipulation of Mechanical and Microstructural Properties of Whey Protein Gels Using De-Structured Starch and Salts
Source: MDPI journal article supplement (doi:10.3390/gels8070399), 2022-06-23
Supplement: s1 [file s1]

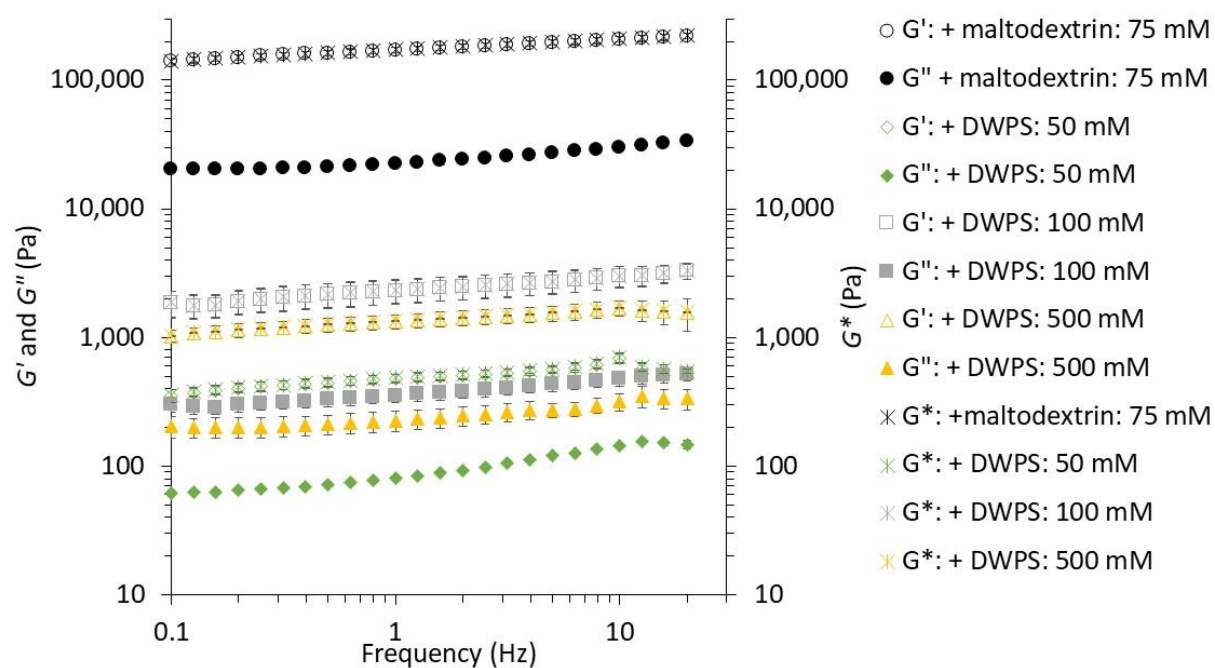

**Figure S1:** Frequency sweep of 13% w/w WPI + 4% w/w maltodextrin at 75 mM NaCl and 13% w/w WPI + 4% w/w 140 °C DWPS at 50, 100, and 500 mM NaCl at 20 °C at 1% strain. Values are plotted as means  $\pm$  standard error.
